# Supplementary material for: Human Polyclonal Antibodies Prevent Lethal Zika Virus Infection in Mice
Source: PubMed Central journal article supplement (PMC6614477; doi:10.1038/s41598-019-46291-9), 2019-07-08
Supplement: 41598_2019_46291_MOESM1_ESM.pdf [file 41598_2019_46291_MOESM1_ESM.pdf]

# **Human Polyclonal Antibodies Prevent Lethal Zika Virus Infection in Mice**

Emilie Branche, Ayo Yila Simon, Nicholas Sheets, Kenneth Kim, Douglas Barker, Anh-Viet T. Nguyen, Harpreet Sahota, Matthew Perry Young, Rebecca Salgado, Anila Mamidi, Karla M. Viramontes, Trevor Carnelley, Hongyu Qiu, Annie Elong Ngono, Jose Angel Regla-Nava, Mercylia Xevana Susantono, Joan M. Valls Cuevas, Kieron Kennedy, Shantha Kodihalli and Sujan Shresta

## **Supplementary information:**

- **Supplementary Figures:**

**FIGURE S1**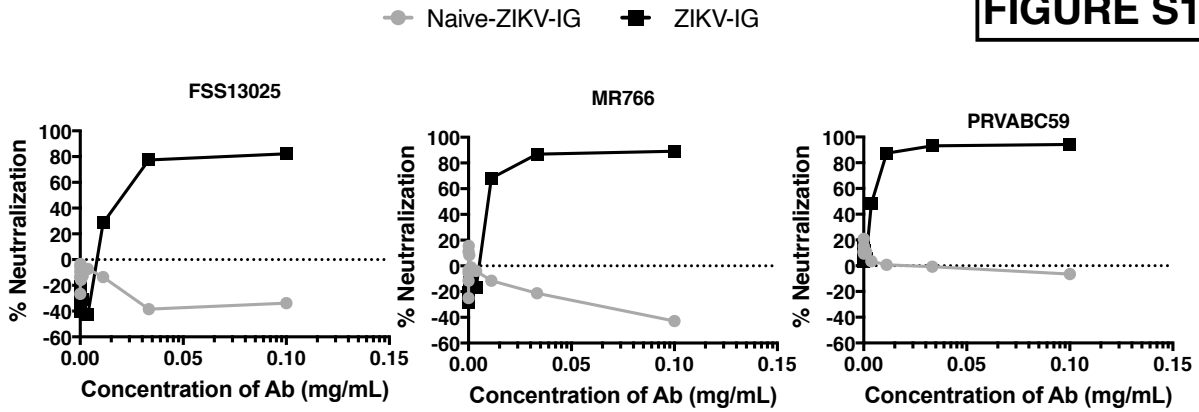**FIGURE S2**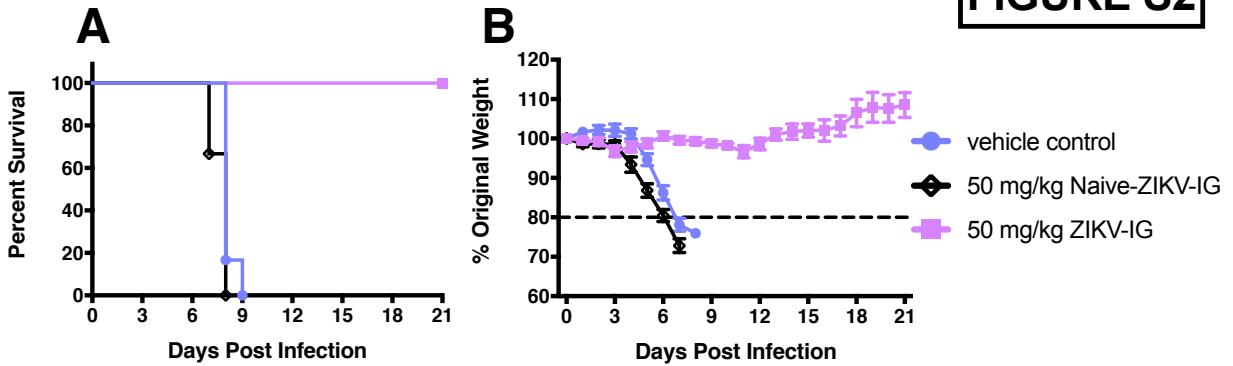**C**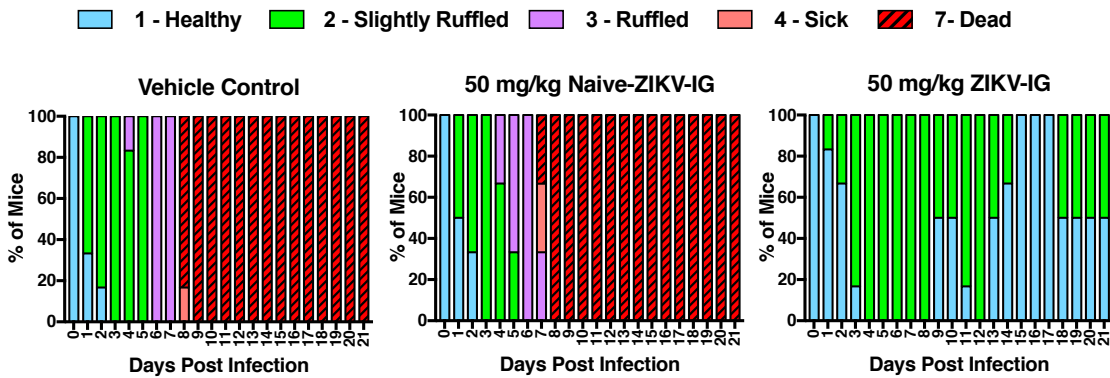

**Figure S3**

**Viral RNA**

**Viral Load**

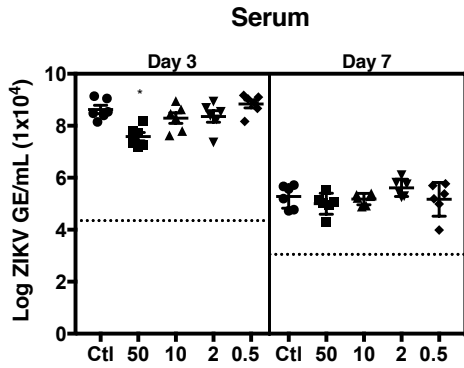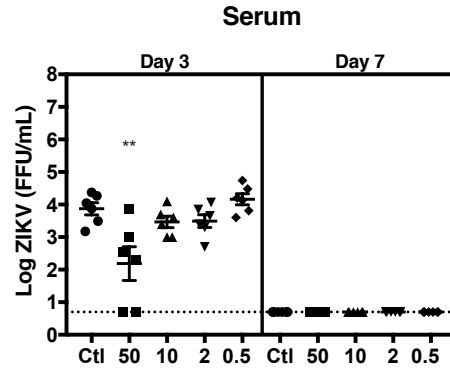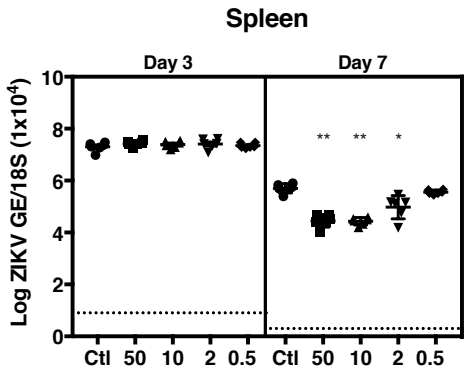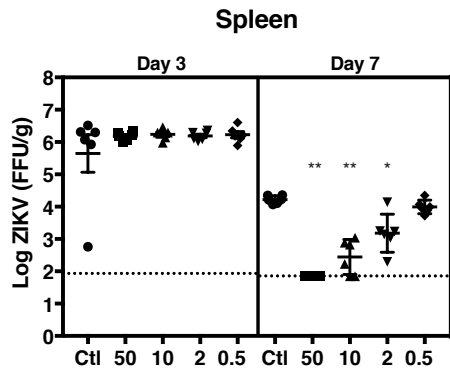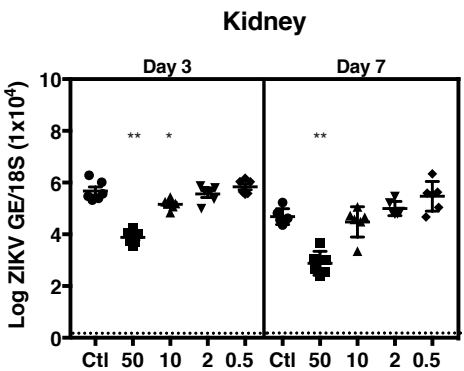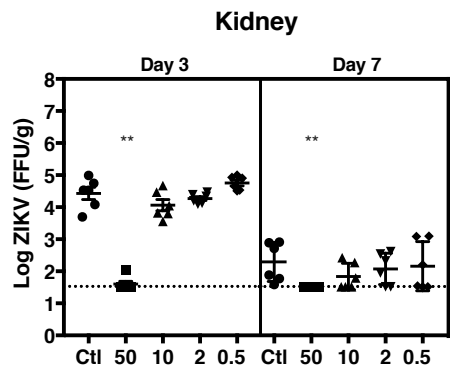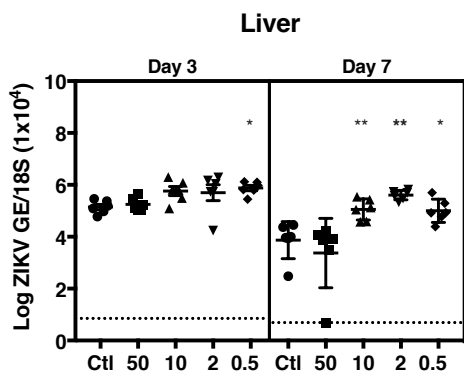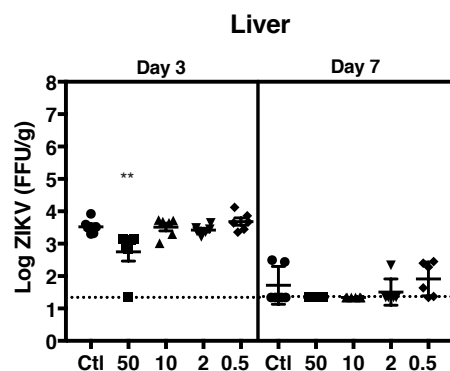

**Figure S4**

**Viral RNA**

**Viral Load**

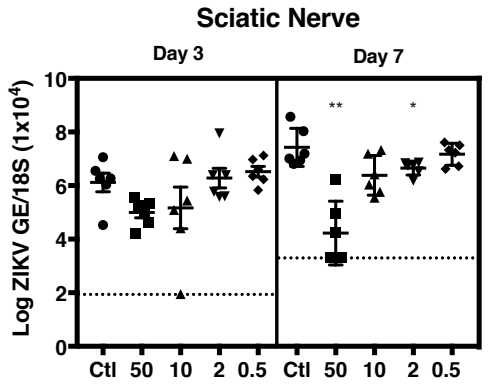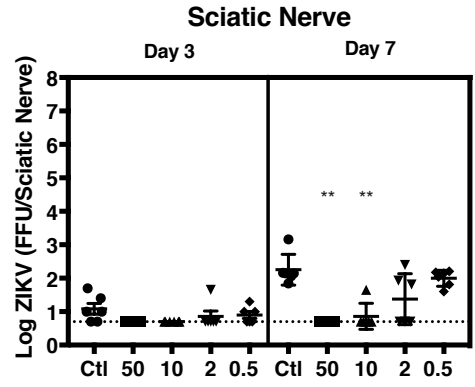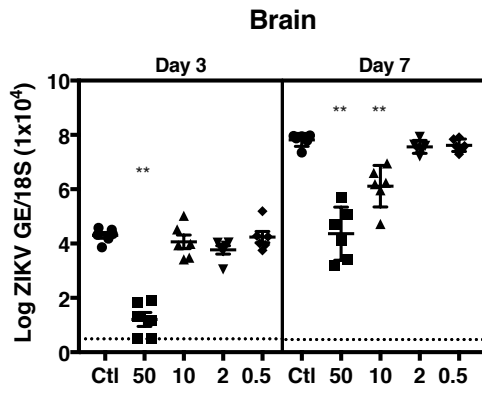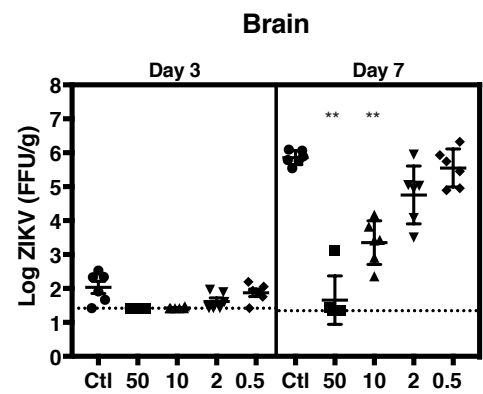



**FIGURE S5**

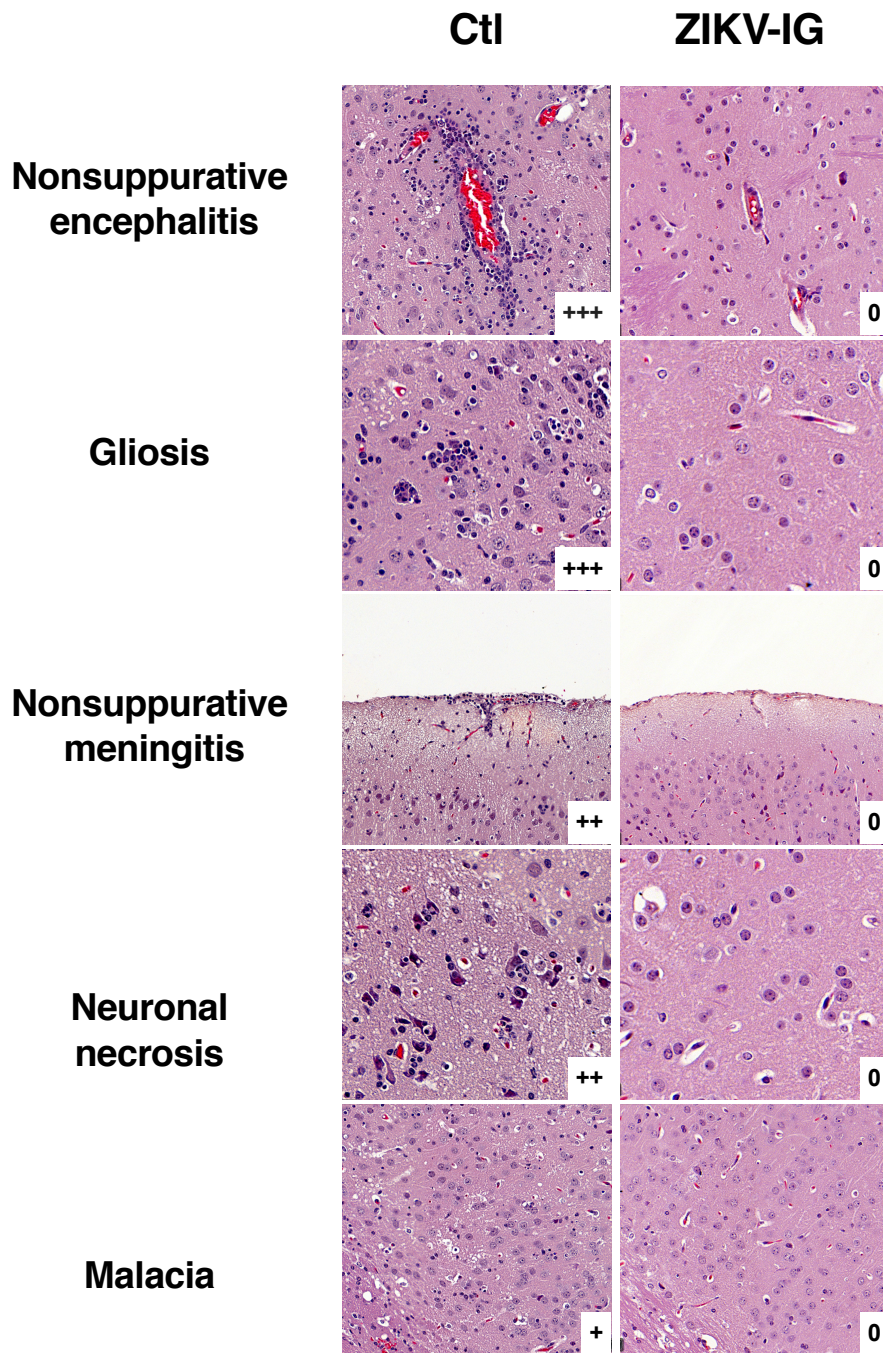

## Supplementary Legends

### **Figure S1: ZIKV-IG neutralized FSS13025, MR766 and PRVABC59 ZIKV strains in vitro**

Neutralization capacity of ZIKV-IG and placebo (naïve-ZIKV-IG) was assessed against ZIKV strains FSS13025, MR766, and PRVABC59 via U937-DC-SIGN cells and flow cytometry-based assays. Dotted line indicates 0% neutralization. ZIKV-IG (black squares) was compared to naïve-ZIKV-IG (grey circles).

### **Figure S2: Both Vehicle control and naïve-ZIKV-IG treatments do not enhance survival or reduce weight loss in ZIKV infected *Ifnar1*<sup>-/-</sup> mice**

Groups of *Ifnar1*<sup>-/-</sup> mice (n=6) were infected with  $1.0 \times 10^3$  FFU of ZIKV strain FSS13025 by the retro-orbital (r.o.) route. At 24 hrs p.i., mice were treated (via the r.o. route) with vehicle, 50 mg/kg naïve-ZIKV-IG or 50 mg/kg ZIKV-IG. (A) Kaplan–Meier survival curves. (B) Mean percent weights, which are plotted for each group relative to the percent weight on day 0 (baseline). (C) Clinical scores. Error bars represent standard error of the mean.

### **Figure S3: ZIKV-IG treatment dose effects on viral RNA and infectious virus levels in the serum, spleen, kidney and liver of ZIKV infected-mice**

Groups of *Ifnar1*<sup>-/-</sup> mice (n=6) were infected with  $1.0 \times 10^3$  FFU of ZIKV FSS13025 (via r.o.route). At 24 hrs p.i., mice were treated (r.o. route) with vehicle (circle), 50 (square), 10 (triangle point up), 2 (triangle point down) or 0.5 (diamond) mg/kg of ZIKV-IG. Viral RNA levels were determined by qRT-PCR (left panel) and infectious virus level by FFA (right panel) in the serum, kidney, spleen and liver at days 3 and 7 p.i. Dotted lines indicate the limit of detection. Treated groups were compared to vehicle control group for each tissue type and time-point using

Bonferroni corrected non-parametric Wilcoxon Rank-Sum tests. Error bars represent standard error of the mean.

**Figure S4: ZIKV-IG treatment dose effects on viral RNA and infectious virus levels in the sciatic nerve and brain of ZIKV infected-mice**

Groups of *Ifnar1<sup>-/-</sup>* mice (n=6) were infected with  $1.0 \times 10^3$  FFU of ZIKV FSS13025 (r.o. route). At 24 hrs, mice were treated (r.o. route) with vehicle, (circle), 50 (square), 10 (triangle point up), 2 (triangle point down) or 0.5 (diamond) mg/kg of ZIKV-IG. Viral RNA levels were determined by qRT-PCR (left panel) and infectious virus levels by FFA (right panel) in the sciatic nerves and brain at days 3 and 7 p.i. Dotted lines indicate the limit of detection. Groups were performed for each tissue type and time-point using Bonferroni corrected non-parametric Wilcoxon Rank-Sum tests. Error bars represent standard error of the mean.

**Figure S5: ZIKV-IG treatment decreases severity of meningoencephalitis in ZIKV infected-mice**

Groups of *Ifnar1<sup>-/-</sup>* mice (n=8) were infected with  $1.0 \times 10^3$  FFU of ZIKV FSS13025 (r.o. route). At 24 hrs p.i., mice were treated (r.o. route) with vehicle control or 50 mg/kg of ZIKV-IG. In vehicle-treated control mice (left column), pathologic changes included nonsuppurative encephalitis, gliosis, nonsuppurative meningitis, neuronal necrosis, and malacia. These lesions were minimal to absent in mice treated with 50mg/kg ZIKV-IG (right column). Grades of lesions (0 to +++) are shown with each corresponding micrograph. Hematoxylin & eosin stain.

- **Supplementary Tables:**

**Table 2: Analysis of median time to death between vehicle control group naïve-ZIKV-IG and ZIKV-IG-treated groups**

| Treatment Group                      | % survival | Fisher Exact Test p-value | Median Survival (days) | Logrank Test p-value |
|--------------------------------------|------------|---------------------------|------------------------|----------------------|
| <b>Comparison to vehicle control</b> |            |                           |                        |                      |
| Vehicle control                      | 0          | NA                        | 8                      | NA                   |
| 50 mg/kg naïve ZIKV-IG               | 0          | > 0.9999                  | 8                      | 0.0930               |
| 50 mg/kg ZIKV-IG                     | 100        | 0.0022**                  | Undefined              | 0.0005**             |
| <b>Comparison to naïve-ZIKV-IG</b>   |            |                           |                        |                      |
| Vehicle control                      | 0          | > 0.9999                  | 8                      | 0.0930               |
| 50 mg/kg naïve ZIKV-IG               | 0          | NA                        | 8                      | NA                   |
| 50 mg/kg ZIKV-IG                     | 100        | 0.0022**                  | Undefined              | 0.0012**             |

\*\* statistically significant (p < 0.05)

**Table S2: Statistical analysis results of ZIKV-IG therapeutic dose effect as compared to vehicle control on viral RNA and infectious virus levels**

|        |                      | Viral RNA levels based on qRT-PCR                  |                                                |                                                    |                                                | Infectious virus levels based on FFA               |                                                |                                                    |                                                |
|--------|----------------------|----------------------------------------------------|------------------------------------------------|----------------------------------------------------|------------------------------------------------|----------------------------------------------------|------------------------------------------------|----------------------------------------------------|------------------------------------------------|
|        |                      | Day 3                                              |                                                | Day7                                               |                                                | Day 3                                              |                                                | Day7                                               |                                                |
| Tissue | ZIKV-IG dose (mg/kg) | Exact Wilcoxon rank-sum p-value vs vehicle control | Bonferroni adjusted p-value vs vehicle control | Exact Wilcoxon rank-sum p-value vs vehicle control | Bonferroni adjusted p-value vs vehicle control | Exact Wilcoxon rank-sum p-value vs vehicle control | Bonferroni adjusted p-value vs vehicle control | Exact Wilcoxon rank-sum p-value vs vehicle control | Bonferroni adjusted p-value vs vehicle control |
| Serum  | 50                   | 0.004*                                             | 0.017*                                         | 0.310                                              | 1.000                                          | 0.011*                                             | 0.043*                                         | 1.000                                              | 1.000                                          |
|        | 10                   | 0.310                                              | 1.000                                          | 0.818                                              | 1.000                                          | 0.169                                              | 0.675                                          | 1.000                                              | 1.000                                          |
|        | 2                    | 0.485                                              | 1.000                                          | 0.180                                              | 0.719                                          | 0.240                                              | 0.961                                          | 1.000                                              | 1.000                                          |
|        | 0.5                  | 0.394                                              | 1.000                                          | 1.000                                              | 1.000                                          | 0.394                                              | 1.000                                          | 1.000                                              | 1.000                                          |
| Spleen | 50                   | 0.180                                              | 0.719                                          | 0.002*                                             | 0.009*                                         | 1.000                                              | 1.000                                          | 0.002*                                             | 0.009*                                         |
|        | 10                   | 0.485                                              | 1.000                                          | 0.002*                                             | 0.009*                                         | 0.937                                              | 1.000                                          | 0.002*                                             | 0.009*                                         |
|        | 2                    | 0.310                                              | 1.000                                          | 0.004*                                             | 0.017*                                         | 0.937                                              | 1.000                                          | 0.009*                                             | 0.035*                                         |
|        | 0.5                  | 0.937                                              | 1.000                                          | 0.065                                              | 0.260                                          | 0.699                                              | 1.000                                          | 0.065                                              | 0.260                                          |
| Kidney | 50                   | 0.002*                                             | 0.009*                                         | 0.002*                                             | 0.009*                                         | 0.002*                                             | 0.009*                                         | 0.002*                                             | 0.009*                                         |

|               |     |        |        |        |        |        |        |        |        |
|---------------|-----|--------|--------|--------|--------|--------|--------|--------|--------|
|               | 10  | 0.009* | 0.035* | 0.937  | 1.000  | 0.180  | 0.719  | 0.128  | 0.511  |
|               | 2   | 0.937  | 1.000  | 0.093  | 0.372  | 0.394  | 1.000  | 0.370  | 1.000  |
|               | 0.5 | 0.240  | 0.961  | 0.015* | 0.061  | 0.240  | 0.961  | 0.660  | 1.000  |
| Liver         | 50  | 0.485  | 1.000  | 0.310  | 1.000  | 0.002* | 0.009* | 0.455  | 1.000  |
|               | 10  | 0.026* | 0.104  | 0.002* | 0.009* | 0.818  | 1.000  | 0.455  | 1.000  |
|               | 2   | 0.065  | 0.260  | 0.002* | 0.009* | 0.589  | 1.000  | 0.455  | 1.000  |
|               | 0.5 | 0.004* | 0.017* | 0.004* | 0.017* | 0.310  | 1.000  | 0.275  | 1.000  |
| Sciatic Nerve | 50  | 0.041* | 0.165  | 0.002* | 0.009* | 0.061  | 0.242  | 0.002* | 0.009* |
|               | 10  | 0.485  | 1.000  | 0.093  | 0.372  | 0.061  | 0.242  | 0.002* | 0.009* |
|               | 2   | 0.937  | 1.000  | 0.009* | 0.035* | 0.197  | 0.788  | 0.054  | 0.216  |
|               | 0.5 | 0.485  | 1.000  | 0.818  | 1.000  | 0.448  | 1.000  | 0.584  | 1.000  |
| Brain         | 50  | 0.002* | 0.009* | 0.002* | 0.009* | 0.015* | 0.061  | 0.002* | 0.009* |
|               | 10  | 0.485  | 1.000  | 0.002* | 0.009* | 0.015* | 0.061  | 0.002* | 0.009* |
|               | 2   | 0.015* | 0.061  | 0.093  | 0.372  | 0.102  | 0.407  | 0.026* | 0.104  |
|               | 0.5 | 0.394  | 1.000  | 0.132  | 0.528  | 0.515  | 1.000  | 0.310  | 1.000  |

\* =Significant Wilcoxon rank-sum p-value  $\leq 0.05$  (Bonferroni adjusted p-value  $\leq 0.05$ ).

**Table S3: Reagents, antibodies, primers, and probes used in this study****Real-time PCR primers**

| Name | Forward                       | Reverse                      |
|------|-------------------------------|------------------------------|
| ZIKV | 5'-TTGGTCATGATACTGCTGATTGC-3' | 5'-CCTTCCACAAAGTCCCTATTGC-3' |
| 18S  | 5'-CGGCTACCACATCCAAGGAA-3'    | 5'-GCTGGAATTACCGCGGCT-3'     |

**Real-time PCR probes**

| Name | Probe                                               |
|------|-----------------------------------------------------|
| ZIKA | 5'-[6-FAM]-CGGCATACAGCATCAGGTGCATAGGAG-[Tamra-Q]-3' |
| 18S  | 5'-[6-FAM]-TGCTGGCACCAGACTTGCCCTC-[Tamra-Q]-3'      |

**Antibodies**

| Name/Protein targeted                              | Clone                   | Provider                             | Catalog number                           |
|----------------------------------------------------|-------------------------|--------------------------------------|------------------------------------------|
| mouse pan-flavivirus                               | 4G2                     | BioXcell                             | hybridoma from ATCC                      |
| Peroxidase AffiniPure Goat Anti-Mouse IgG antibody |                         | Jackson                              | 115-035-072                              |
| Antibodies FOR IF AND IHC                          | ZIKV NS2B<br>Polyclonal | Genetex                              | GTX133308                                |
| ZIKV-IG                                            |                         | Emergent BioSolutions<br>Canada Inc. | Lot #<br>PD_740_ZKP_16_001_00<br>3_ER_vl |
| Naive-ZIKV-IG                                      |                         | Emergent BioSolutions<br>Canada Inc. | lot# : PD_740_16_001_007                 |

|                             |  |               |        |
|-----------------------------|--|---------------|--------|
| PE-labeled anti-human CD209 |  | BD Pharmingen | 551265 |
|-----------------------------|--|---------------|--------|

## Other reagents

| Name                                                           | Provider                     | Catalog number |
|----------------------------------------------------------------|------------------------------|----------------|
| QIAmp Viral RNA Mini Kit                                       | Qiagen                       | 52906          |
| RNeasy Mini Kit                                                | Qiagen                       | 74106          |
| qScript One-Step qRT-PCR kit                                   | Quanta Biosciences           | 95057-200      |
| RNAlater                                                       | Invitrogen                   | AM7021         |
| RLT buffer                                                     | Qiagen                       | 79216          |
| True blue                                                      | Sera Care                    | 5510-0030      |
| Carboxymethyl Cellulose Sodium Salt,<br>Medium Viscosity (CMC) | Sigma                        | C9481-500G     |
| True-Blue                                                      | SERA CARE                    | 5510-0030      |
| 10% Buffered Formalin Phosphate                                | Fischer Chemical             | SF100-4        |
| 10% Zinc Formalin                                              | BBC Biochemical              | MA0102414      |
| Sucrose                                                        | Affymetrix                   | MFCD00006626   |
| Formic Acid 88%                                                | Fisher Chemical              | MFCD00003297   |
| Tissue-Tek OCT                                                 | Electron Microscopy Services | 6255001        |
| Paraformaldehyde 16%                                           | Alfa Aesar                   | 3025-89-4      |
| Horse serum                                                    | Vector Laboratories          | S-2000         |
| Rabbit IgG                                                     | Vector Laboratories          | I-1000         |
| Donkey anti-rabbit AlexaFluor 488                              | Thermo Fisher                | A-21206        |
| DAPI                                                           | Invitrogen                   | D1306          |
| Antigen Unmasking Solution                                     | Vector Laboratories          | H-3300         |
| BLOXALL                                                        | Vector Laboratories          | SP-6000        |
| Normal goat serum                                              | Thermo Fisher                | 50062Z         |

|                                             |                          |           |
|---------------------------------------------|--------------------------|-----------|
| ImmPRESS HRP                                | Vector Laboratories      | MP-7451   |
| ImmPACT NovaRED                             | Vector Laboratories      | SK-4805   |
| Modified Mayer's Hematoxylin                | Thermo Fisher            | 72804     |
| RPMI 1640                                   | Gibco                    | 11875-093 |
| HEPES                                       | Gibco                    | 15630-080 |
| penicillin/streptomycin                     | Gibco                    | 15140-122 |
| Cytofix/Cytoperm                            | BD Bioscience,           | 51-2090ZK |
| 10x Perm/Wash Buffer                        | BD Bioscience            | 51-2091KZ |
| Pierce FITC using an antibody labelling kit | Thermo Fisher Scientific | 53027     |



**Table S4: Clinical signs score on a 7-point scale**

| <b>SCORE</b> | <b>INITIALS</b> | <b>DESCRIPTION</b> | <b>APPEARANCE</b>                                                            | <b>MOBILITY</b>                                                                                           | <b>ATTITUDE</b>                              |
|--------------|-----------------|--------------------|------------------------------------------------------------------------------|-----------------------------------------------------------------------------------------------------------|----------------------------------------------|
| 1            | H               | Healthy            | Smooth Coat. Bright Eyes.                                                    | Active, Scurrying, Burrowing                                                                              | Alert                                        |
| 2            | SR              | Slightly Ruffled   | Slightly Ruffled coat (usually only around head and neck)                    | Active, Scurrying, Burrowing                                                                              | Alert                                        |
| 3            | R               | Ruffled            | Ruffled Coat throughout body. A “wet” appearance.                            | Active, Scurrying, Burrowing                                                                              | Alert                                        |
| 4            | S               | Sick               | Very Ruffled coat. Slightly closed, inset eyes.                              | Walking, but no scurrying.                                                                                | Mildly Lethargic                             |
| 5            | VS              | Very Sick          | Very Ruffled Coat. Closed, inset eyes.                                       | Slow to no movement. Will return to upright position if put on its side.                                  | Extremely Lethargic                          |
| 6            | E               | Euthanize          | Very ruffled Coat. Closed, inset eyes. Moribund requiring humane euthanasia. | No movement or uncontrollable, spastic movements. Will NOT return to upright position if put on its side. | Completely Unaware or in Noticeable Distress |
| 7            | D               | Deceased           | ---                                                                          | ---                                                                                                       | ---                                          |
